# Supplementary material for: Functionalization of silver nanoparticles with mPEGylated luteolin for selective visual detection of Hg2+ in water sample
Source: Royal Society of Chemistry journal article supplement (doi:10.1039/c8ra05243c), 2018-01-01
Supplement: c8ra05243c1.pdf [file c8ra05243c1.pdf]

## Functionalization of silver nanoparticles with mPEGylated luteolin for selective visual detection of Hg<sup>2+</sup> in water sample

Weixia Qing<sup>a</sup>, Mengnan Zhao<sup>b</sup>, Conghui Kou<sup>b</sup>, Minghua Lu<sup>c</sup> and Yong Wang<sup>\*c</sup>

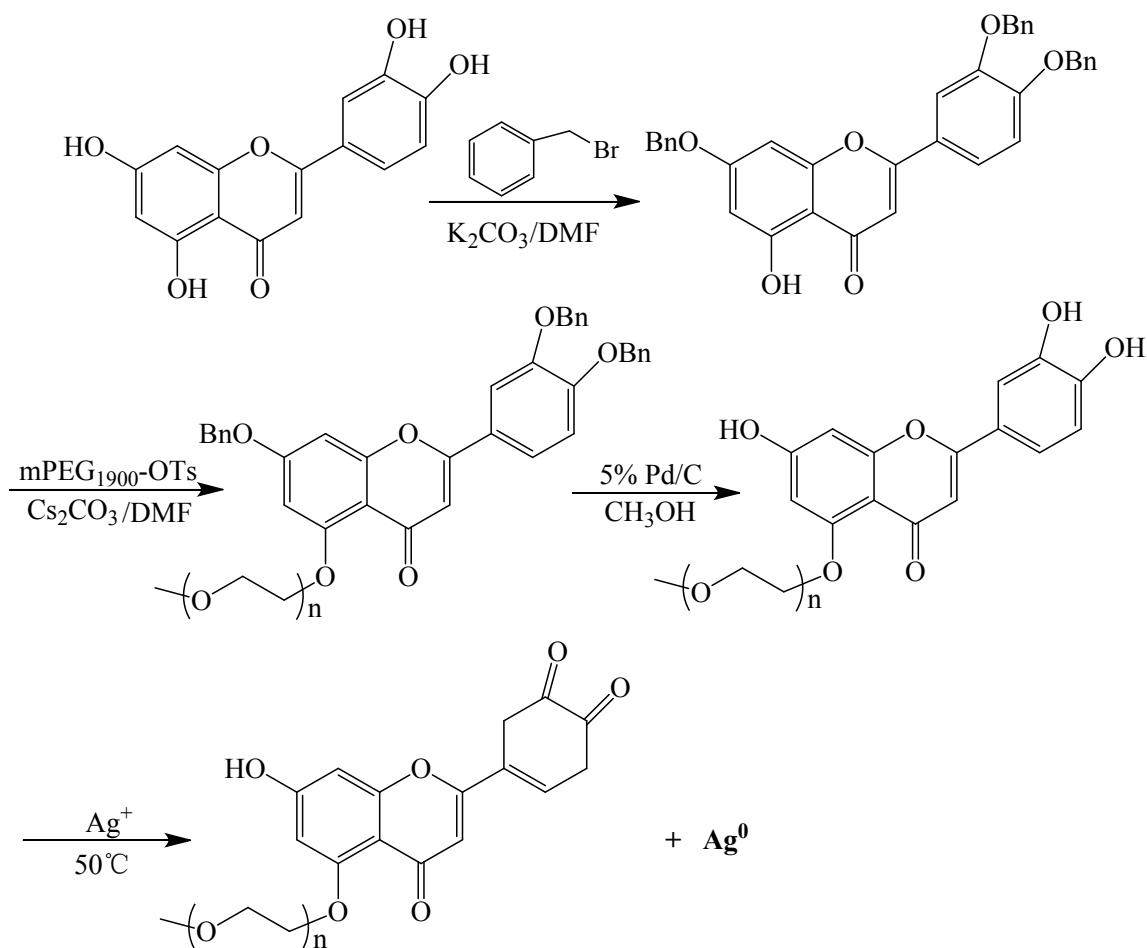

Fig.S1 Synthetic route of mPEGylated luteolin conjugates and mPEGylated luteolin-AgNPs nanoparticles

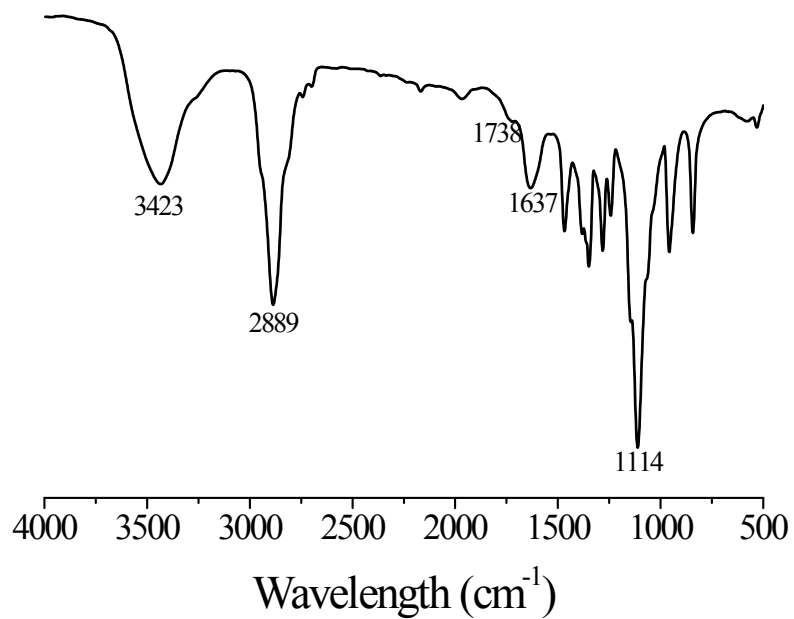

Fig.S2 FT-IR spectra of mPEGylated luteolin-AgNPs

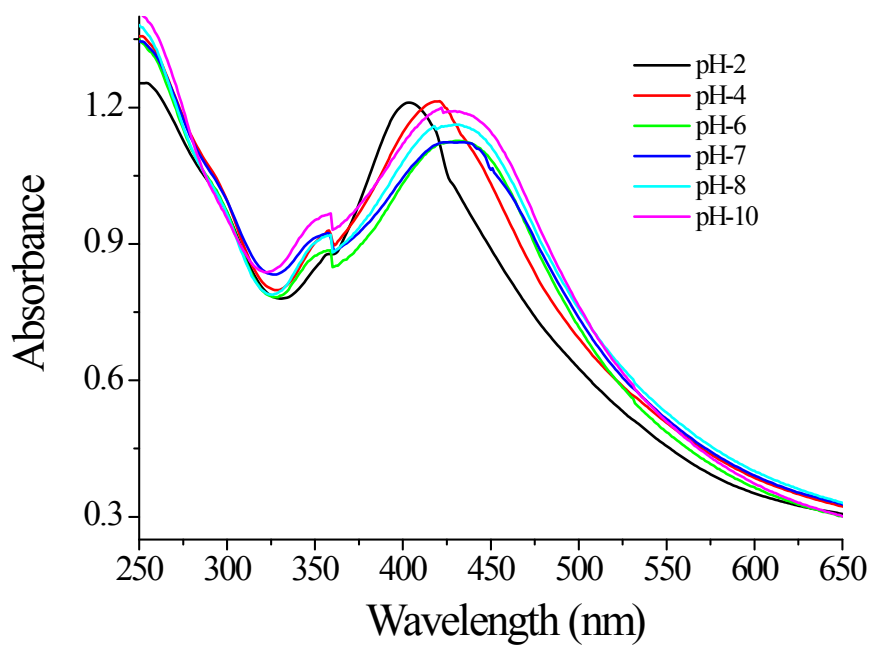

Fig.S3 UV-vis absorption spectrum of mPEGylated luteolin-AgNPs nanoparticles at different pH.

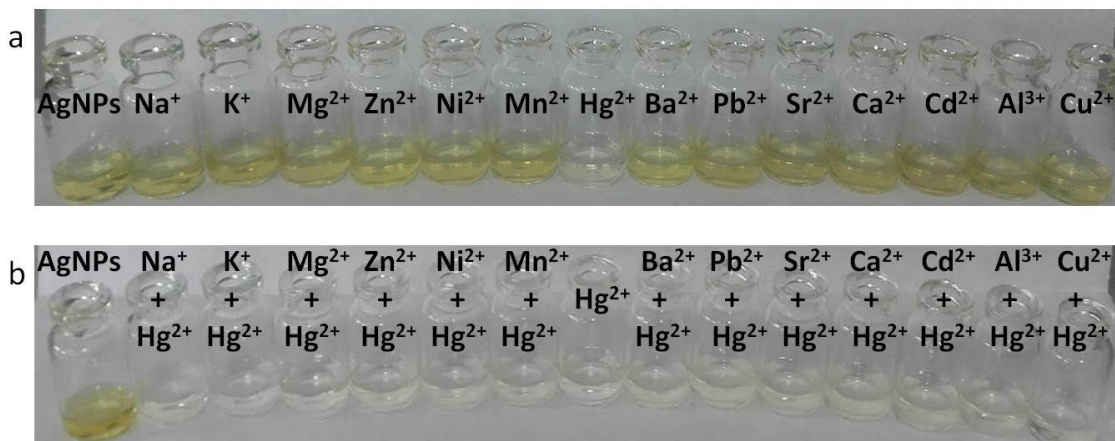

Fig. S4 Colorimetric responses of (a) AgNPs with different metal ions and (b) selectivity for  $\text{Hg}^{2+}$  in presence of equal amounts of other metal ions.

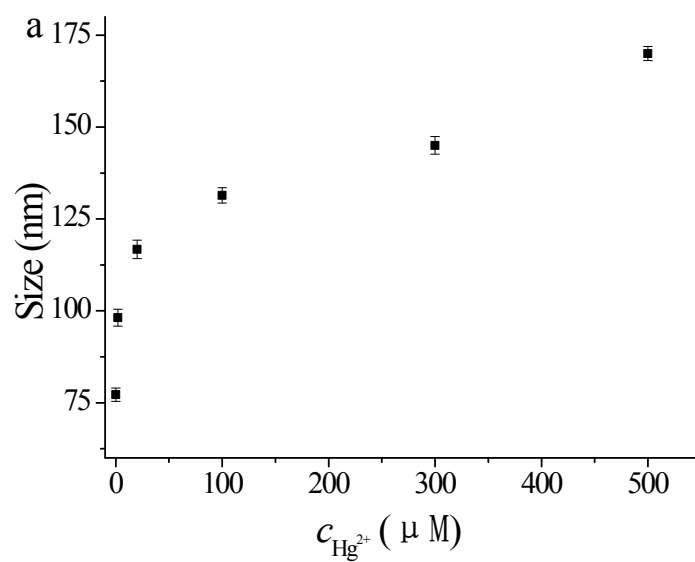

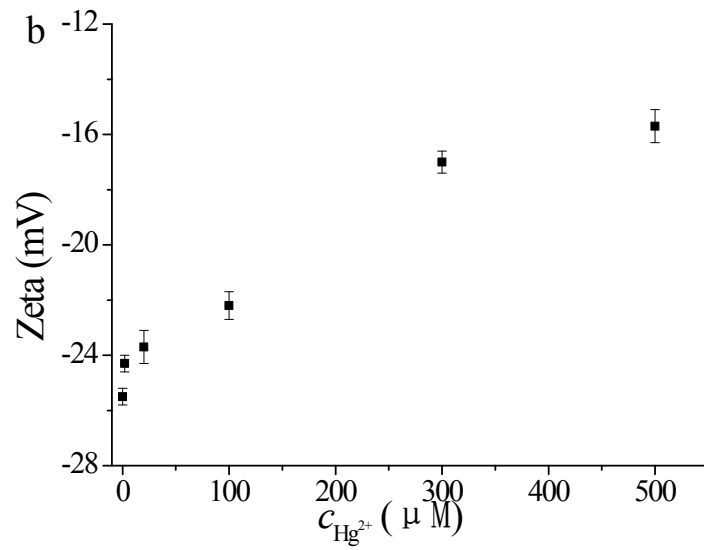

Fig.S5 (a) Average size and (b) zeta potential of mPEGylated luteolin-AgNPs with various concentrations of  $\text{Hg}^{2+}$ .

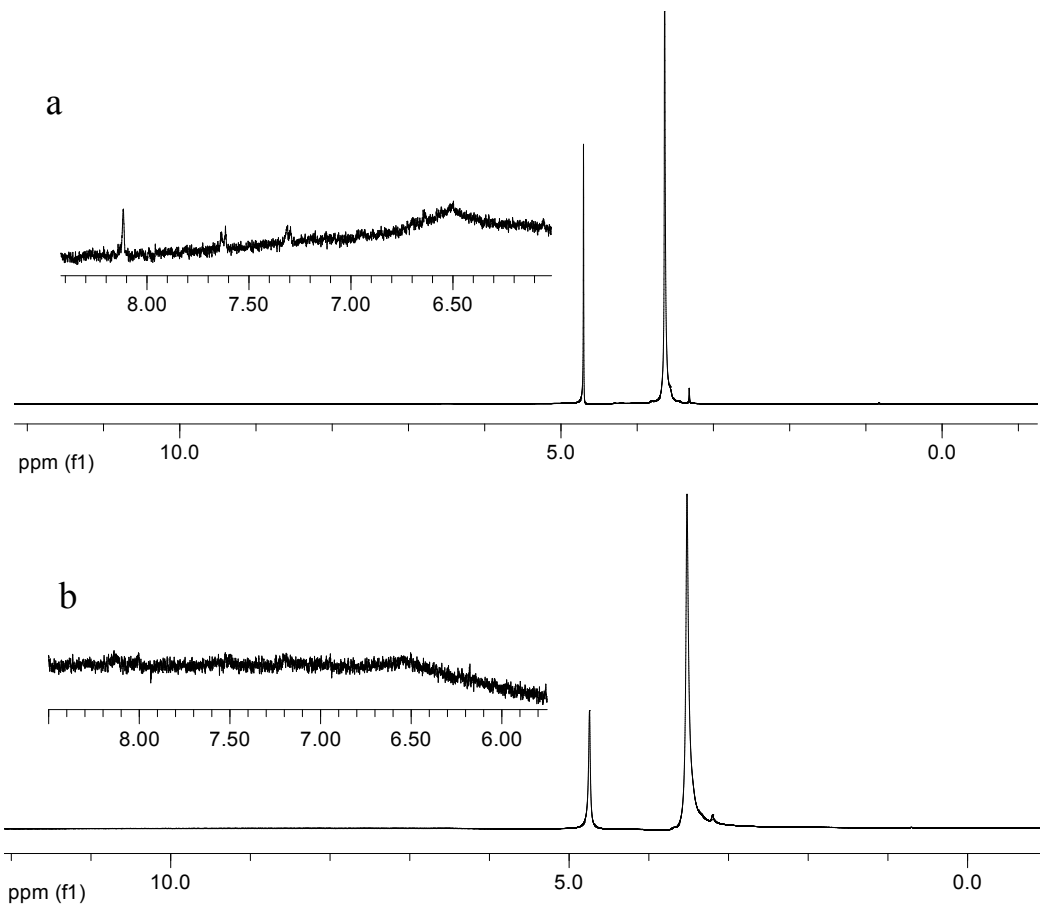

Fig.S6 The  $^1\text{H}$  NMR spectrum of mPEGylated luteolin-AgNPs nanoparticles in  $\text{D}_2\text{O}$  in the absence (a) and presence (b) of  $\text{Hg}^{2+}$ .
